# Supplementary material for: High glucose enhances the activation of NLRP3 inflammasome by ambient fine particulate matter in alveolar macrophages
Source: Springer Nature journal article supplement (doi:10.1186/s12989-023-00552-8), 2023-11-02
Supplement: MOESM5 [file 12989_2023_552_MOESM5_ESM.pdf]

**Figure 3A**

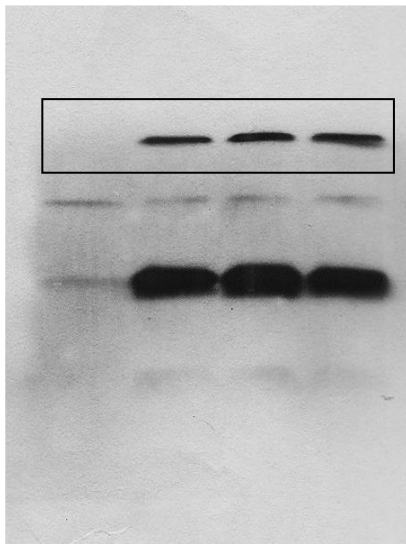

**Pro-IL-1 $\beta$**

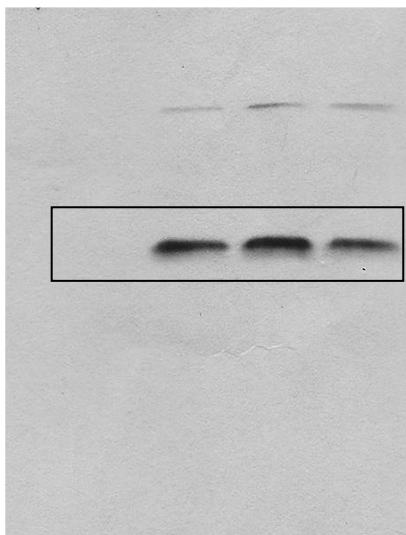

**Cleaved IL-1 $\beta$**

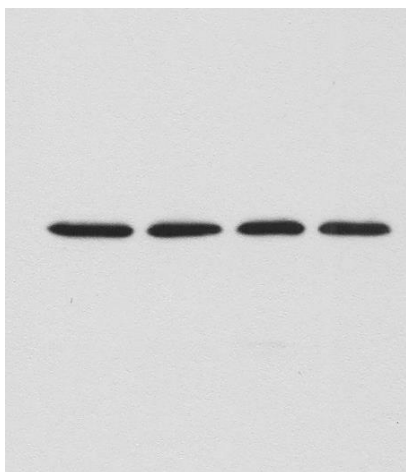

**$\beta$ -actin**

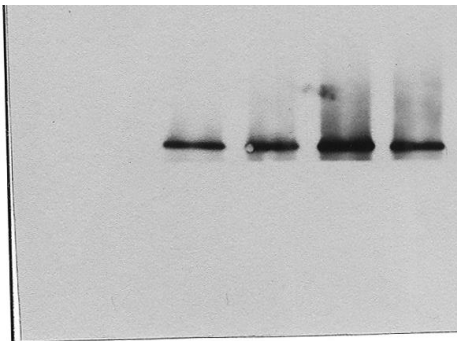

NLRP3

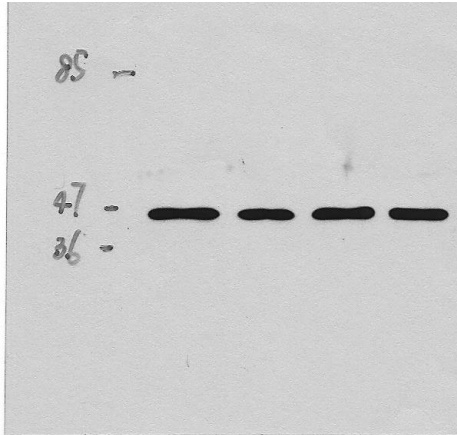

$\beta$ -actin

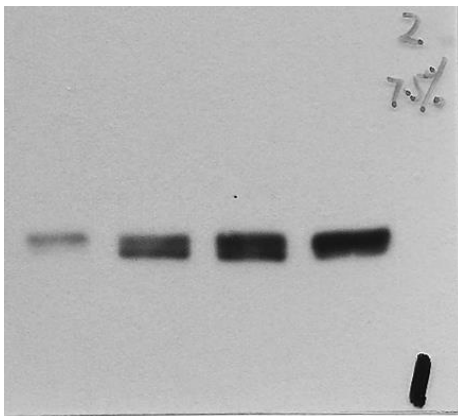

TLR2

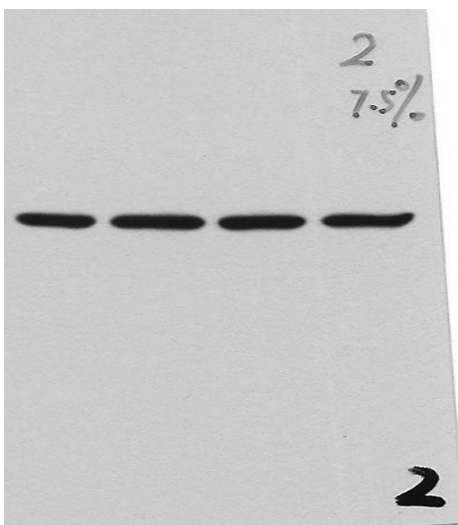

$\beta$ -actin

Figure 4A

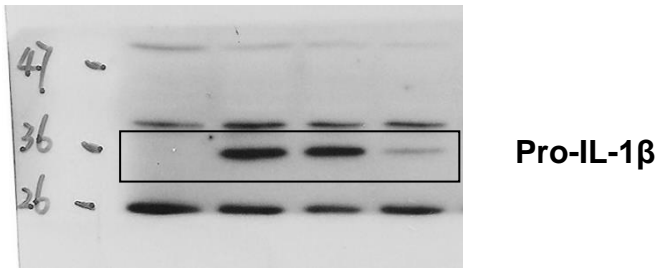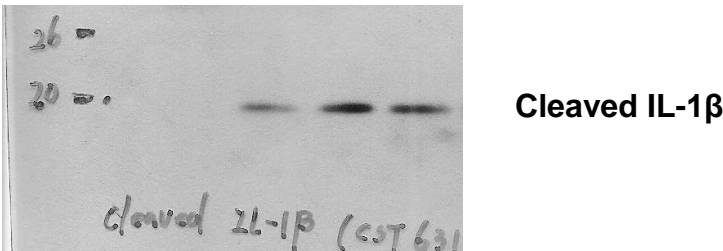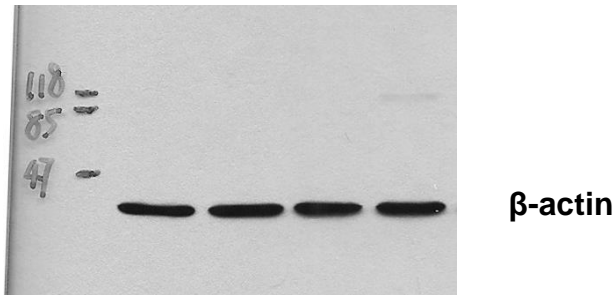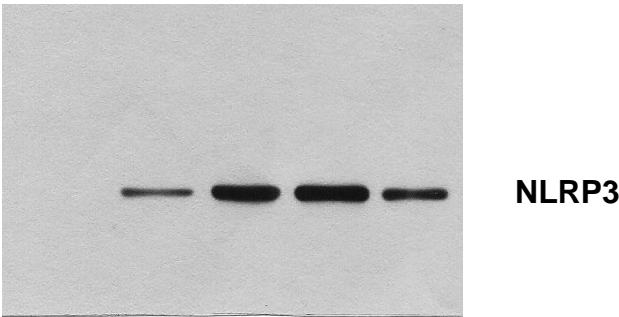

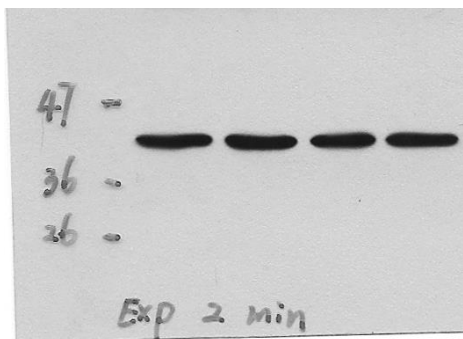

$\beta$ -actin

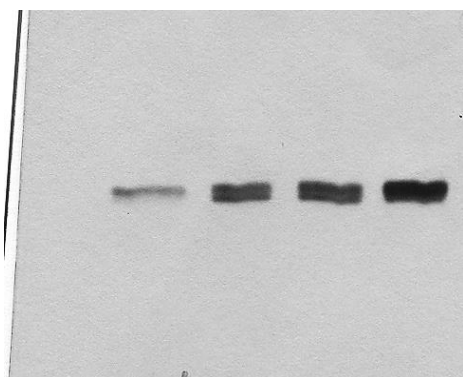

TLR2

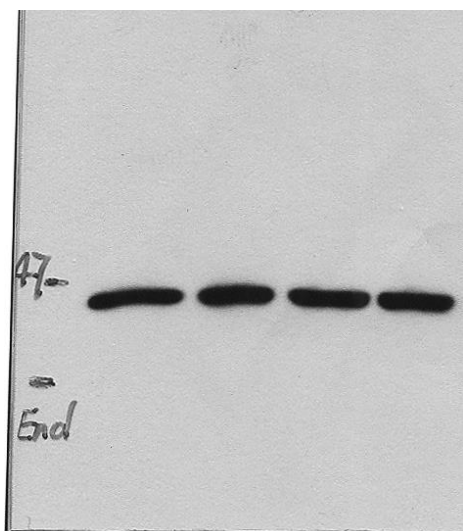

$\beta$ -actin

**Figure 6A**

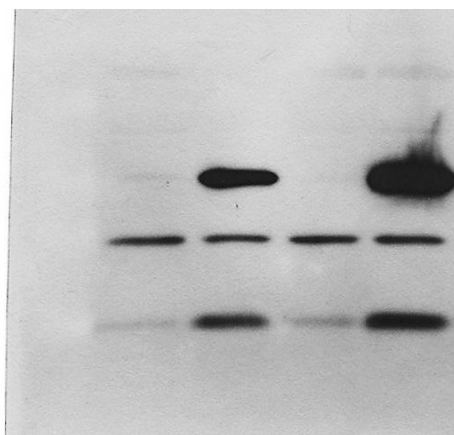

**Pro-IL-1 $\beta$**

n.s.

**Cleaved IL-1 $\beta$**

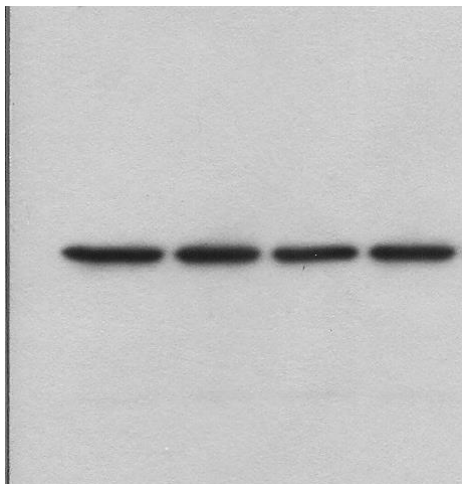

**$\beta$ -actin**

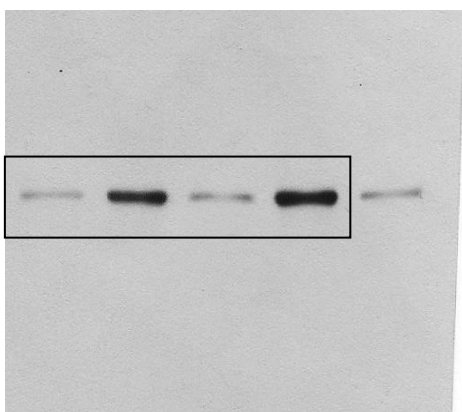

**NLRP3**

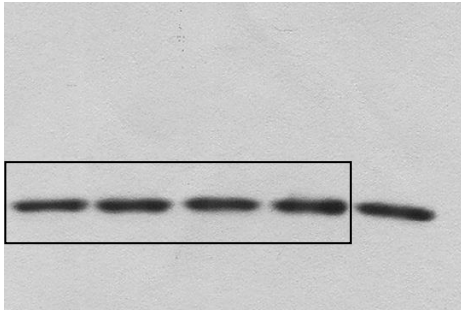

$\beta$ -actin

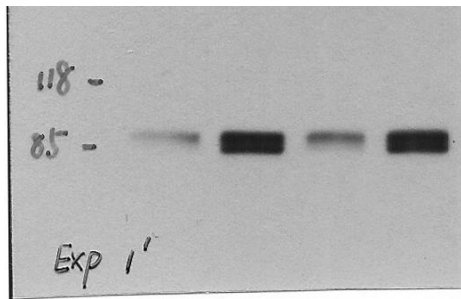

TLR2

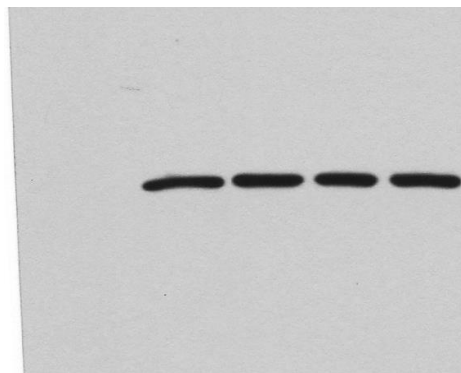

$\beta$ -actin

**Figure 7A**

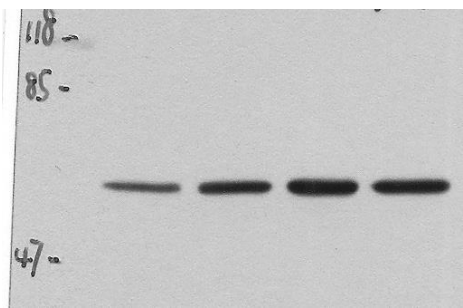

**NF-κB p65 (Nuc)**

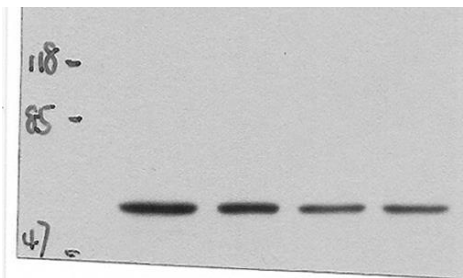

**NF-κB p65 (Cyt)**

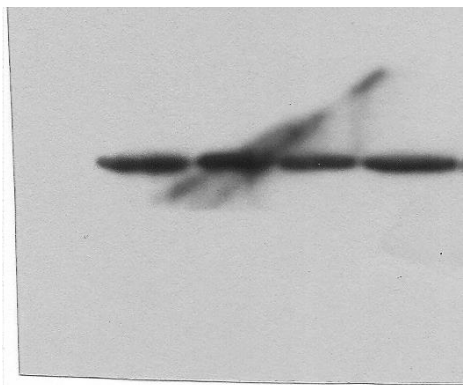

**Histone H3**

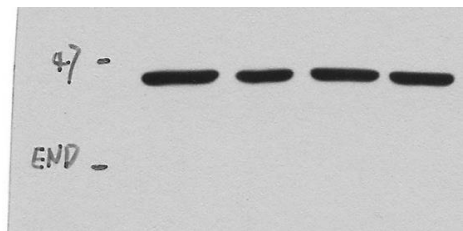

**β-actin**

**Figure 7C**

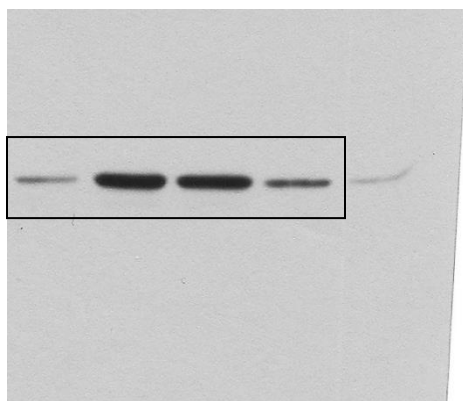

**NF-κB p65 (Nuc)**

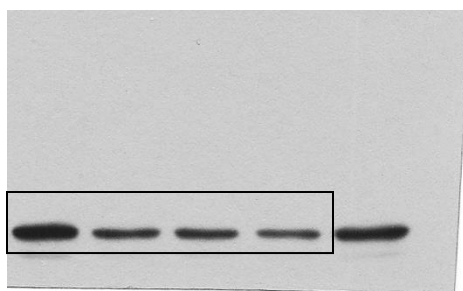

**NF-κB p65 (Cyt)**

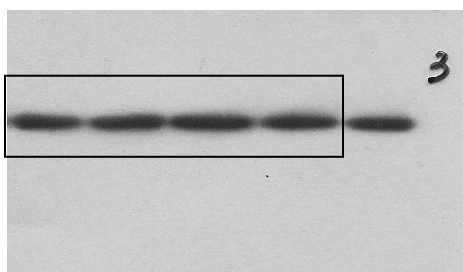

**Histone H3**

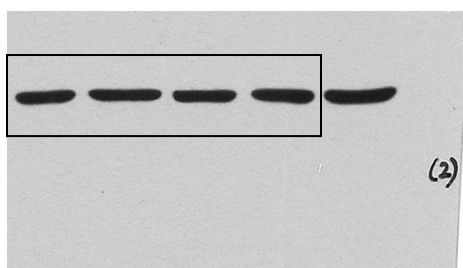

**β-actin**



**Figure 7E**

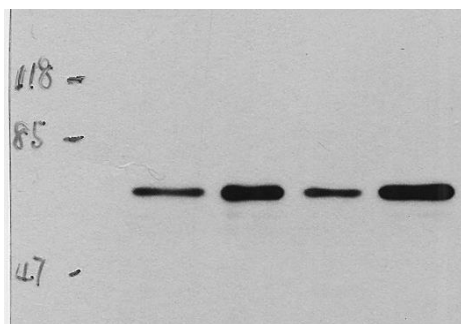

**NF-κB p65 (Nuc)**

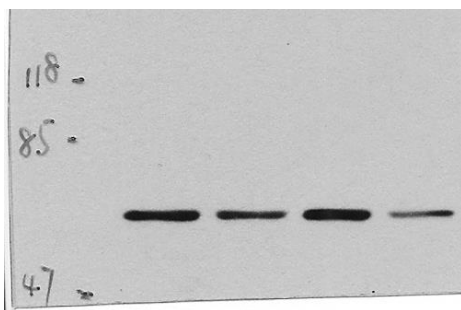

**NF-κB p65 (Cyt)**

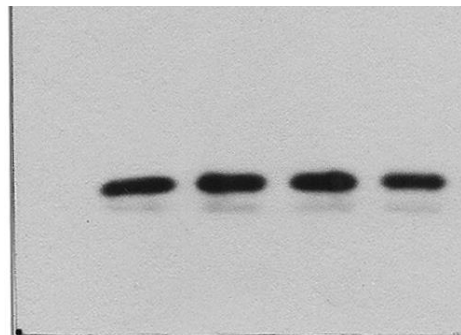

**Histone H3**

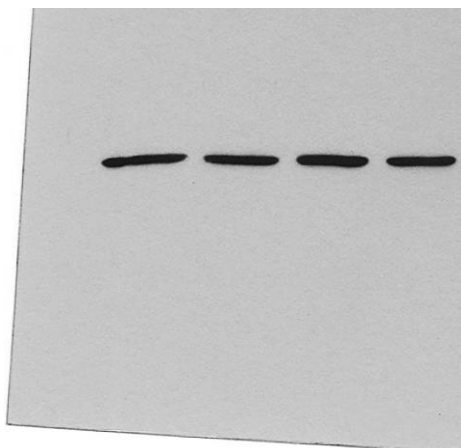

**β-actin**

Figure 9A

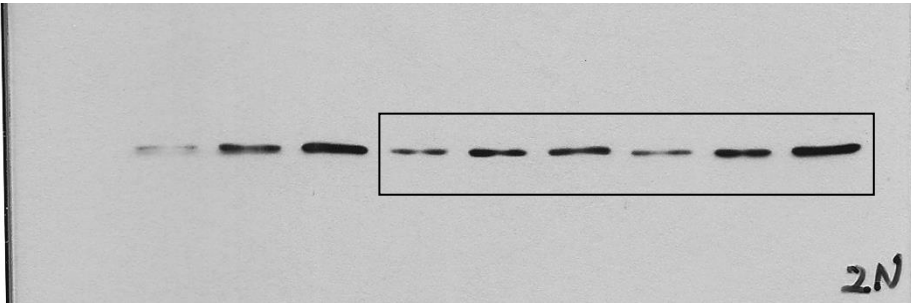

NF-κB p65 (Nuc)

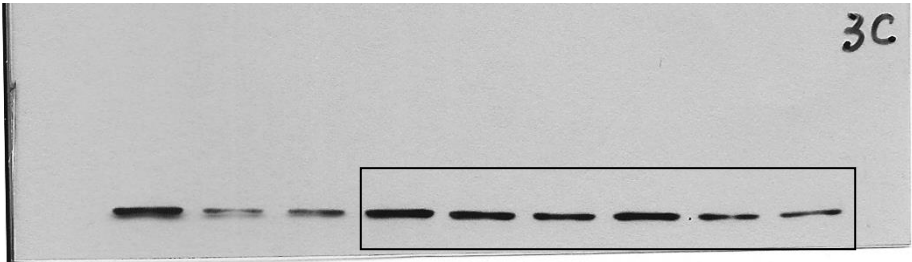

NF-κB p65 (Cyt)

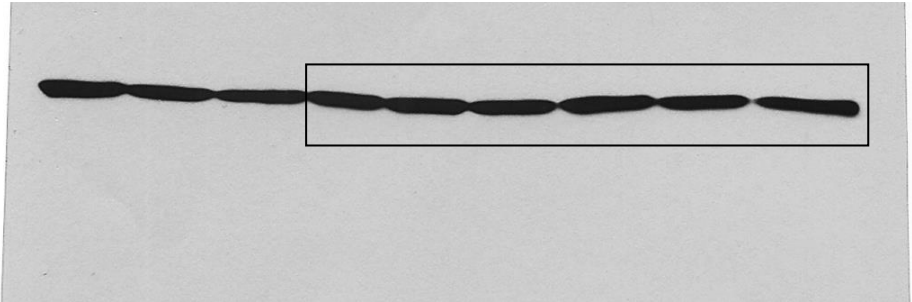

Histone H3

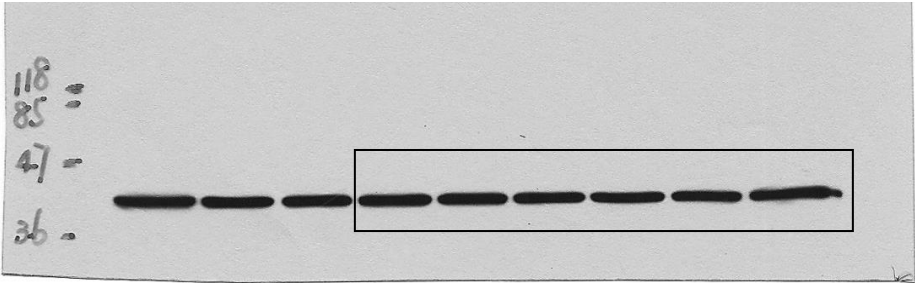

β-actin

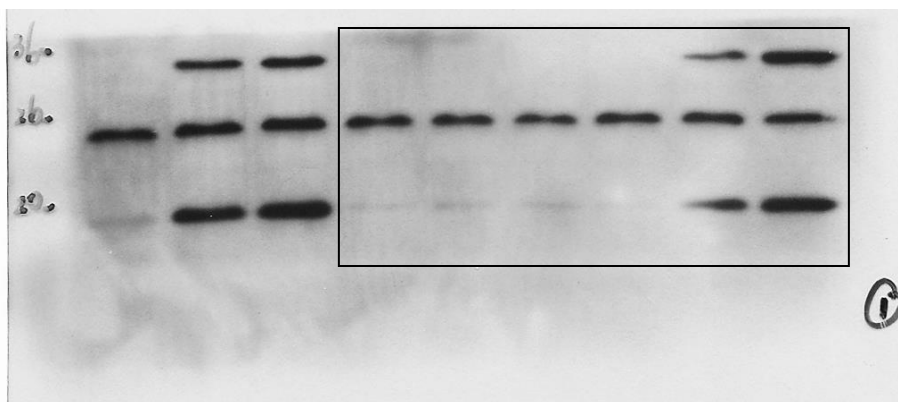

**Pro-IL-1 $\beta$**

n.s.

**Cleaved IL-1 $\beta$**

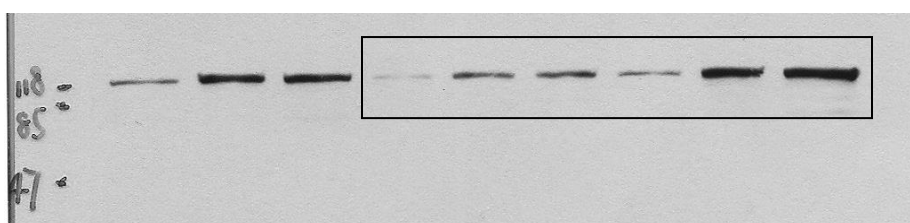

**NLRP3**

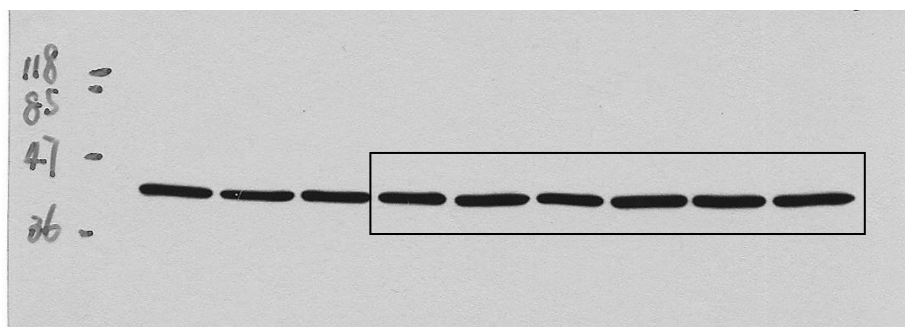

**$\beta$ -actin**
